# Supplementary material for: Foxn1 Is Dynamically Regulated in Thymic Epithelial Cells during Embryogenesis and at the Onset of Thymic Involution
Source: PubMed Central journal article supplement (PMC4794177; doi:10.1371/journal.pone.0151666), 2016-03-16
Supplement: pone.0151666.s002.pdf [file pone.0151666.s002.pdf]

**S1 Table: Antibodies used for flow cytometry and immunohistochemistry**

| Name                | Fluoro-chrome     | Host    | Mono/<br>Polyclonal | Antigen                                 | Clone              | Manufacturer      | Dilution | Valid-<br>ation |
|---------------------|-------------------|---------|---------------------|-----------------------------------------|--------------------|-------------------|----------|-----------------|
| EpCAM               | APC-Cy7           | Rat     | Mono                | TE-71 TEC<br>line                       | G8.8               | Biologend         | 1:200    | 1               |
| EpCAM               | PE                | Rat     | Mono                | As above                                | G8.8               | Biologend         | 1:800    | 1               |
| MHCII               | PE-Cy7            | Rat     | Mono                | C57/BL6<br>spleen cells                 | M5/114.15.2        | Biologend         | 1:1000   | 1               |
| MHCII               | APC-<br>eFluor780 | Rat     | Mono                | As above                                | M5/114.15.2        | eBioscience       | 1:800    | 1               |
| UEA1                | Biotin            |         |                     |                                         | Cat. No.<br>B-1065 | Vector Labs       | 1:800    | 1               |
| Ly-51               | PE                | Rat     | Mono                | Lymphoma cell<br>line, T-cell<br>clones | 6C3                | Biologend         | 1:800    | 1               |
| CD205               | PE-Cy7            | Rat     | Mono                |                                         | 205yekta           | eBioscience       | 1:40     | 2               |
| TCR $\beta$         | PerCP-<br>Cy5.5   | Hamster | Poly                | Purified TCR                            | H57-597            | Biologend         | 1:400    | 1               |
| CD4                 | PerCP-<br>Cy5.5   | Rat     | Mono                |                                         | RM4-5              | eBioscience       | 1:400    | 1               |
| CD8                 | PerCP-<br>Cy5.5   | Rat     | Mono                |                                         | 53-6.7             | eBioscience       | 1:400    | 1               |
| Ter119              | PerCP-<br>Cy5.5   | Rat     | Mono                |                                         | Ter119             | eBioscience       | 1:400    | 1               |
| Cd11c               | PerCP-<br>Cy5.5   | Hamster | Poly                |                                         | N418               | eBioscience       | 1:400    | 1               |
| CD31                | PerCP-<br>Cy5.5   | Rat     | Mono                | Haematopoietic<br>cell line             | 390                | Biologend         | 1:400    | 1               |
| Ki67                | PE                | Rat     | Mono                |                                         | Sola15             | eBioscience       | 1:400    | 3               |
| Active<br>Caspase-3 | PE                | Rabbit  | Poly                | Human active<br>caspase-3               | C92-605            | BD<br>Biosciences | 1:5      | 4               |
| Streptavidin        | BV650             |         |                     |                                         | Cat. No.<br>405231 | Biologend         | 1:500    |                 |

1. Bredenkamp *et al.* 2014. *Development* 141: 1627-1637.
2. Baik *et al.* 2013. *European Journal of Immunology* 43: 589-594.
3. Cowan *et al.* 2014. *Journal of Immunology* 193: 1204-1212.
4. Small and Kraal 2003. *International Immunology* 15: 197-203.
