# Supplementary material for: Foxn1 Is Dynamically Regulated in Thymic Epithelial Cells during Embryogenesis and at the Onset of Thymic Involution
Source: PubMed Central journal article supplement (PMC4794177; doi:10.1371/journal.pone.0151666), 2016-03-16
Supplement: pone.0151666.s003.pdf [file pone.0151666.s003.pdf]

**S2 Table: Primers used for RT-qPCR**

| <b>Gene</b>  | <b>Left primer (5' to 3')</b> | <b>Right primer (5' to 3')</b> |
|--------------|-------------------------------|--------------------------------|
| <i>Aire</i>  | GGTTCCTCCCCTTCCATC            | GGCACACTCATCCTCGTTCT           |
| <i>Ccl25</i> | GAGTGCCACCCTAGGTCATC          | CCAGCTGGTGCTTACTCTGA           |
| <i>Ccr11</i> | CCTCTCCCAGCTTAAACAGC          | AGTATTCCGCTGACTGGTTCA          |
| <i>Cd40</i>  | CCATGTGACTCAGGCGAAT           | TAACCCGAAGCCCTTGATT            |
| <i>Cd80</i>  | TCGTCTTTCACAAGTGTCTTCAG       | TTGCCAGTAGATTTCGGTCTTC         |
| <i>Dll4</i>  | AGGTGCCACTTCGGTTACAC          | GGGAGAGCAAATGGCTGATA           |
| <i>Foxn1</i> | TGACGGAGCACTTCCCTTAC          | GACAGGTTATGGCGAACAGAA          |
| <i>Hmbs</i>  | TCCCTGAAGGATGTGCCTAC          | AAGGGTTTTCCCGTTTGC             |
| <i>Hprt</i>  | TCCTCCTCAGACCGCTTTT           | CCTGGTTCATCATCGCTAATC          |
| <i>Kitl</i>  | GCGCTGCCTTTCCTTATG            | TCCTTGGTTTTGACAAGAGGAT         |
| <i>Ywhaz</i> | CTTCCTGCAGCCAGAAGC            | GGGTTTCCTCCAATCACTAGC          |
